# Supplementary material for: Perceived Stigma and Its Associated Factors Among People Living With Hiv/aids in Bharatpur Art Center, Chitwan District, Nepal
Source: Research Square preprint supplement (doi:10.21203/rs.3.rs-8582580/v1), 2026-01-22
Supplement: Supplementary file 1 [file 1e5802a9409e3f6c22bd1943.pdf]

## Questionnaire:

| Section I: SOCIO-DEMOGRAPHIC PART |                                |                                                                                              |         |
|-----------------------------------|--------------------------------|----------------------------------------------------------------------------------------------|---------|
| QN                                | Question                       | Response                                                                                     | Remarks |
| 1                                 | <b>Age(completed in years)</b> | .....                                                                                        |         |
| 2                                 | <b>Sex</b>                     | 1. Male<br>2. Female<br>3. Transgender                                                       |         |
| 3                                 | <b>Place of Origin</b>         | 1. Metropolitan city<br>2. Municipality<br>3. Sub Metropolitan City<br>4. Rural Municipality |         |
| 4                                 | <b>Ethnicity</b>               | 1. Brahmin/Chhetri<br>2. Dalit<br>3. Janajati<br>4. Madhesi<br>5. Muslim<br>6. Others        |         |
| 5                                 | <b>Religion</b>                | 1. Hindu<br>2. Buddha<br>3. Muslim<br>4. Kirat<br>5. Cristian<br>6. Others                   |         |
| 6                                 | <b>Marrital Status</b>         | 1. Never Married<br>2. Married or living together<br>3. Separated/Divorced<br>4. Widowed     |         |
| 7                                 | <b>Educational Status</b>      | 1. Only read and write<br>2. Basic(1-8)                                                      |         |

|                              |                                                            |                                                                                                                                                                                       |  |
|------------------------------|------------------------------------------------------------|---------------------------------------------------------------------------------------------------------------------------------------------------------------------------------------|--|
|                              |                                                            | 3. Secondary(9-12)<br>4. More than secondary                                                                                                                                          |  |
| 8                            | <b>Functional Status</b>                                   | 1. Yes<br>2. No                                                                                                                                                                       |  |
| 8.1                          | <b>If yes Occupation Status</b>                            | 1. Agriculture<br>2. Housewife<br>3. Job<br>4. Labor<br>5. Business<br>6. Foreign Employment<br>7. Others                                                                             |  |
| 9                            | <b>Risk group</b>                                          | 1. Sex worker<br>2. People who inject drug(PWID)<br>3. MSM and TG<br>4. Blood or organ recipient<br>5. Clients of sex worker<br>6. Migrants<br>7. Spouse/Partner migrants<br>8. Other |  |
| 10                           | <b>Family Income</b>                                       | .....                                                                                                                                                                                 |  |
| Section II: HIV Related Part |                                                            |                                                                                                                                                                                       |  |
| 11                           | <b>Duration of Diagnosis</b>                               | 1. Short-Term(less than1 Year)<br>2. Mid-Term(1year- 5years)<br>3. Long-Term(more than 5years)                                                                                        |  |
| 12                           | <b>Modes of Transmission</b>                               | 1. Unsafe Sexual contact<br>2. Vertical transmission<br>3. Sharing needles and blades<br>4. Organ or blood donation                                                                   |  |
| 13                           | <b>Physical relation with your partner after diagnosis</b> | 1. Yes<br>2. No                                                                                                                                                                       |  |
| 13.1                         | <b>If yes how many life time sex partner</b>               | 1. equal to one<br>2. more than one                                                                                                                                                   |  |
| 13.2                         | <b>If yes HIV status of partner</b>                        | 1. Positive                                                                                                                                                                           |  |

|      |                                 |                                                                                                                                                       |  |
|------|---------------------------------|-------------------------------------------------------------------------------------------------------------------------------------------------------|--|
|      |                                 | 2. Negative<br>3. Inconclusive<br>4. Don't Know                                                                                                       |  |
| 14   | <b>Disclosure of HIV Status</b> | 1. Yes<br>2. No                                                                                                                                       |  |
| 14.1 | <b>If yes with whom</b>         | 1. With Intimate partner<br>2. With family<br>3. Close friends<br>4. Relatives<br>5. With every one                                                   |  |
| 15   | <b>Reason for HIV testing</b>   | 1. STI<br>2. TB<br>3. Pregnancy<br>4. Surgery<br>5. HIV/AIDS Symptoms<br>6. Child delivered from positive mother<br>7. None of above(pleased specify) |  |
| 16   | <b>Used condom last sex</b>     | 1. Yes<br>2. No<br>3. Forgot                                                                                                                          |  |

| Section III: Psychological Related Question |                                 |                                                                                       |  |
|---------------------------------------------|---------------------------------|---------------------------------------------------------------------------------------|--|
| 17                                          | Do you feel excluded due to HIV | 1. Yes<br>2. No                                                                       |  |
| 17.1                                        | If yes where(multiple answer)   | 1. Community<br>2. Job<br>3. School/college<br>4. Health Service<br>5. Family members |  |

|    |                                  |                 |  |
|----|----------------------------------|-----------------|--|
|    |                                  | 6. others       |  |
| 18 | Do you feel hopeless due to HIV  | 1. Yes<br>2. No |  |
| 19 | Do you feel depressed due to HIV | 1. Yes<br>2. No |  |

| Section IV: HIV stigma scale |                                                                              |                                                                      |  |
|------------------------------|------------------------------------------------------------------------------|----------------------------------------------------------------------|--|
| 1                            | In your life , any one knows you have HIV                                    | 1. Strongly disagree<br>2. Disagree<br>3. Agree<br>4. Strongly agree |  |
| 2                            | Did you feel guilty because of HIV                                           | 1. Strongly disagree<br>2. Disagree<br>3. Agree<br>4. Strongly agree |  |
| 3                            | Due to the people's attitudes about HIV makes you feel worse about your self | 1. Strongly disagree<br>2. Disagree<br>3. Agree<br>4. Strongly agree |  |
| 4                            | Did you tell someone you have HIV risky                                      | 1. Strongly disagree<br>2. Disagree<br>3. Agree<br>4. Strongly agree |  |
| 5                            | What is your opinion People with HIV lose job when employers find out        | 1. Strongly disagree<br>2. Disagree<br>3. Agree<br>4. Strongly agree |  |
| 6                            | Did you work hard to keep your HIV a secret                                  | 1. Strongly disagree<br>2. Disagree                                  |  |

|    |                                                                                        |                                                                      |  |
|----|----------------------------------------------------------------------------------------|----------------------------------------------------------------------|--|
|    |                                                                                        | 3. Agree<br>4. Strongly agree                                        |  |
| 7  | Did you feel that you are not good person than other because you have HIV              | 1. Strongly disagree<br>2. Disagree<br>3. Agree<br>4. Strongly agree |  |
| 8  | Did you never feel ashamed of having HIV                                               | 1. Strongly disagree<br>2. Disagree<br>3. Agree<br>4. Strongly agree |  |
| 9  | People with HIV are treated like outcasts                                              | 1. Strongly disagree<br>2. Disagree<br>3. Agree<br>4. Strongly agree |  |
| 10 | Most people believe a person who has HIV is dirty                                      | 1. Strongly disagree<br>2. Disagree<br>3. Agree<br>4. Strongly agree |  |
| 11 | It is easier to avoid new friendships than worry about telling someone that I have HIV | 1. Strongly disagree<br>2. Disagree<br>3. Agree<br>4. Strongly agree |  |
| 12 | Having HIV makes me feel unclean                                                       | 1. Strongly disagree<br>2. Disagree<br>3. Agree<br>4. Strongly agree |  |
| 13 | Since learning I have HIV, I feel set apart and isolated from the rest of the world    | 1. Strongly disagree<br>2. Disagree<br>3. Agree<br>4. Strongly agree |  |
| 14 | Most people think a person with HIV                                                    | 1. Strongly disagree                                                 |  |

|    |                                                                           |                                                                      |  |
|----|---------------------------------------------------------------------------|----------------------------------------------------------------------|--|
|    | is disgusting                                                             | 2. Disagree<br>3. Agree<br>4. Strongly agree                         |  |
| 15 | Having HIV makes me feel I'm a bad person                                 | 1. Strongly disagree<br>2. Disagree<br>3. Agree<br>4. Strongly agree |  |
| 16 | Most people with HIV are rejected when others find out                    | 1. Strongly disagree<br>2. Disagree<br>3. Agree<br>4. Strongly agree |  |
| 17 | I am very careful who I tell that I have HIV                              | 1. Strongly disagree<br>2. Disagree<br>3. Agree<br>4. Strongly agree |  |
| 18 | Some people who know I have HIV have grown more distant                   | 1. Strongly disagree<br>2. Disagree<br>3. Agree<br>4. Strongly agree |  |
| 19 | Since learning I have HIV, I worry about people discriminating against me | 1. Strongly disagree<br>2. Disagree<br>3. Agree<br>4. Strongly agree |  |
| 20 | Most people are uncomfortable around someone with HIV                     | 1. Strongly disagree<br>2. Disagree<br>3. Agree<br>4. Strongly agree |  |
| 21 | I never feel the need to hide the fact I have HIV                         | 1. Strongly disagree<br>2. Disagree<br>3. Agree<br>4. Strongly agree |  |

|    |                                                               |                                                                      |  |
|----|---------------------------------------------------------------|----------------------------------------------------------------------|--|
| 22 | I worry that people may judge me when they learn I have HIV   | 1. Strongly disagree<br>2. Disagree<br>3. Agree<br>4. Strongly agree |  |
| 23 | Having HIV in my body is disgusting to me                     | 1. Strongly disagree<br>2. Disagree<br>3. Agree<br>4. Strongly agree |  |
| 24 | I have been hurt by how people reacted to learning I have HIV | 1. Strongly disagree<br>2. Disagree<br>3. Agree<br>4. Strongly agree |  |
| 25 | I worry people who know I have HIV will tell others           | 1. Strongly disagree<br>2. Disagree<br>3. Agree<br>4. Strongly agree |  |
| 26 | I regret having told some people that I have HIV              | 1. Strongly disagree<br>2. Disagree<br>3. Agree<br>4. Strongly agree |  |
| 27 | As a rule, telling others that I have HIV has been a mistake  | 1. Strongly disagree<br>2. Disagree<br>3. Agree<br>4. Strongly agree |  |
| 28 | People avoid touching me once they know I have HIV            | 1. Strongly disagree<br>2. Disagree<br>3. Agree<br>4. Strongly agree |  |
| 29 | People I care about stopped calling after learning I have HIV | 1. Strongly disagree<br>2. Disagree                                  |  |

|    |                                                                                           |                                                                      |  |
|----|-------------------------------------------------------------------------------------------|----------------------------------------------------------------------|--|
|    |                                                                                           | 3. Agree<br>4. Strongly agree                                        |  |
| 30 | People have told me that getting HIV is what I deserve for how I lived my life            | 1. Strongly disagree<br>2. Disagree<br>3. Agree<br>4. Strongly agree |  |
| 31 | Some people close to me are afraid others will reject them if it becomes known I have HIV | 1. Strongly disagree<br>2. Disagree<br>3. Agree<br>4. Strongly agree |  |
| 32 | People don't want me around their children once they know I have HIV                      | 1. Strongly disagree<br>2. Disagree<br>3. Agree<br>4. Strongly agree |  |
