# Supplementary material for: Perceived Stigma and Its Associated Factors Among People Living With Hiv/aids in Bharatpur Art Center, Chitwan District, Nepal
Source: Research Square preprint supplement (doi:10.21203/rs.3.rs-8582580/v1), 2026-01-22
Supplement: Supplementary file 2 [file ca69e160f8320d7e73da844f.pdf]

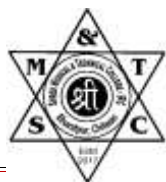

# Shree Medical & Technical College Institutional Review Committee

Ref: SMTC-IRC-20230230-100

26 March 2023

Mr. Amrit Lamichhane

Principal Investigator

Shree Medical and Technical College  
Bharatpur-12, Chitwan

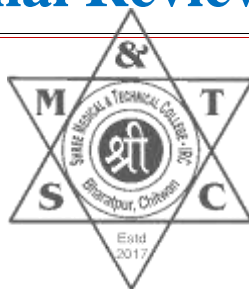

**Subject:** *Approval of thesis proposal entitled “Perceived stigma and its associated factor among people living with hiv/aids in Bharatpur art center, Chitwan district, Nepal”*

Dear **Mr. Lamichhane**

It is my pleasure to inform you that the above-mentioned proposal submitted on 30-02-2023 [Reg. no. 2023-100 has been approved by Shree Medical and Technical College-Institutional Review Committee) according to its Standard Operating Procedures. The ethical approval reference number for your proposal is **SMTC-IRC-20230230-100**.

The investigator(s) has to strictly follow the protocol stipulated in the proposal. Any change in objective(s), problem statement, research question or hypothesis, methodology, implementation procedure, data management and budget that may be necessary in course of the implementation of the research proposal can only be made so and implemented after prior approval from this committee. Thus, it is compulsory to submit the details of such changes intended or desired with justification prior to actual change in the protocol. Expiration date of this proposal is August 2023.

The researchers are directed to strictly abide by the National Ethical Guidelines published by Nepal health research council (NHRC) during the implementation of their research proposal and submit progress report in between and full or summary report upon completion.

It is acknowledged that this project is for student thesis and therefore, the processing fee of NRs 500.00 has been received at SMTC-IRC.

If you have any questions, please contact the member secretary of SMTC-IRC.

Thanking you,

Babita Ghimire  
Chairperson
